# Supplementary material for: TCR Repertoire Characterization for T Cells Expanded in Response to hRSV Infection in Mice Immunized with a Recombinant BCG Vaccine
Source: MDPI journal article supplement (doi:10.3390/v12020233), 2020-02-20
Supplement: s1 [file s1]

Supplementary Figure 1

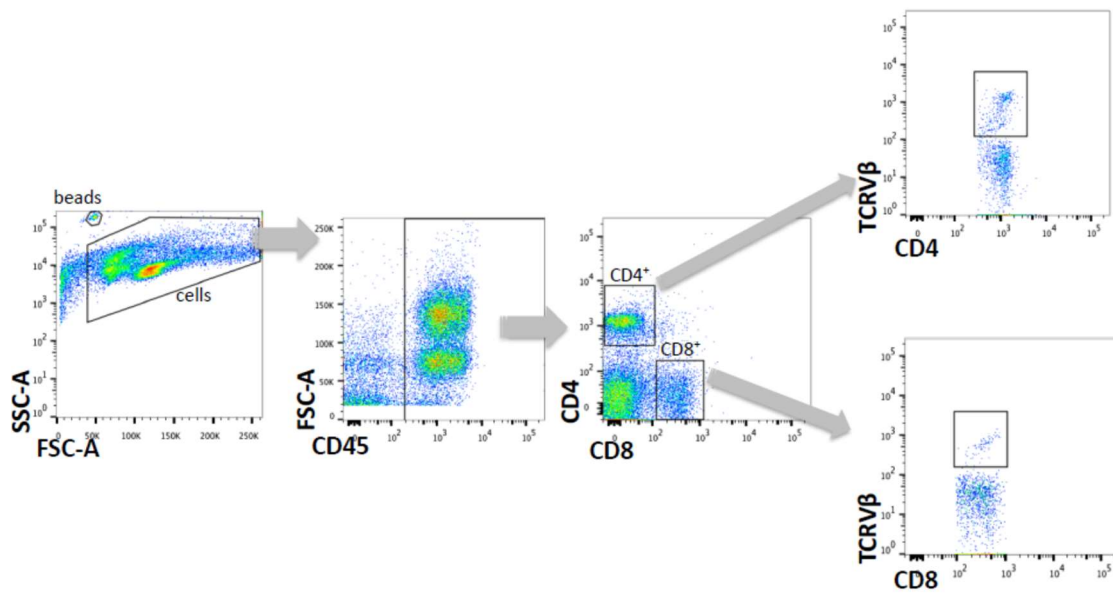

**Figure S1.** Gating strategy to determine the frequency of each TCRV $\beta$  for hRSV-induced T cells. Spleen and lungs from infected mice were stained and evaluated by flow cytometry. Dot plots of gating strategy are shown. CD45<sup>+</sup> cells were gated and then the positive cells for CD4<sup>+</sup> and CD8<sup>+</sup> T cells were selected. Finally, over the CD4<sup>+</sup> and CD8<sup>+</sup> T cells gating, we selected the positive cells for each respective TCRV $\beta$ .
